# Supplementary material
Source: PubMed Central journal article supplement (PMC10199887)
Supplement: 41541_2023_675_MOESM1_ESM.pdf [file 41541_2023_675_MOESM1_ESM.pdf]

## Supplementary Materials

**Supplementary Table 1. Primers used to amplify *map3527*, *ag85b* and *hsp70***

**genes**

| Primers                   | Sequence (5' -3')                                         | Restriction site |
|---------------------------|-----------------------------------------------------------|------------------|
| MAP3527 <sub>C</sub> -F:  | CGCGCGGCAGCC <u>CATATG</u> ACCGCCGCCACCGACAGCTACA         | <i>Nde</i> I     |
| MAP3527 <sub>C</sub> -R:  | TCGACGGAGCTC <u>GAAATC</u> GGCCGGCGGCCCTCCGCCAG           | <i>Eco</i> R I   |
| MAP3527 <sub>NN</sub> -F: | GCTCCGTCGACA <u>AAGCTT</u> GGCACCGTCGGGCCTGGCGCT          | <i>Hind</i> III  |
| MAP3527 <sub>NN</sub> -R: | GTGGTGGTGGT <u>GCTCGAGT</u> GGCGGTGTCCACGCCGATCA<br>CCT   | <i>Xho</i> I     |
| MAP3527 <sub>N</sub> -F:  | GCGCGGCAGCC <u>CATATG</u> GCCACCGTCGGGCCTGGCGCTGGA        | <i>Nde</i> I     |
| MAP3527 <sub>N</sub> -R:  | CGACGGAGCTC <u>GAAATC</u> GGCGGTGTCCACGCCGATCACC          | <i>Eco</i> R I   |
| MAP3527 <sub>CC</sub> -F: | AGCTCCGTCGACA <u>AAGCTT</u> GCCACCGCCGCCACCGACAGCT        | <i>Hind</i> III  |
| MAP3527 <sub>CC</sub> -R: | TGGTGGTGGT <u>GCTCGAGT</u> GGCCGGCGGCCCTCCGCCA            | <i>Xho</i> I     |
| Ag85B <sub>CN</sub> -F:   | GGCCGCCGGCC <u>GAAATC</u> TTTTCGCGTCCGGGCCTGCCC           | <i>Eco</i> R I   |
| Ag85B <sub>CN</sub> -R:   | GACGGTGC <u>GCAAGCTT</u> GTCGCCGCCGCCCGGGGACG             | <i>Hind</i> III  |
| Ag85B <sub>NC</sub> -F:   | GCGTGGACACCGCC <u>GAAATC</u> TTTTCGCGTCCGGGCCTGCC<br>CG   | <i>Eco</i> R I   |
| Ag85B <sub>NC</sub> -R:   | CGGCGGTGC <u>AAGCTT</u> GTCGCCGCCGCCCGGGGACG              | <i>Hind</i> III  |
| Hsp70 <sub>CN</sub> -F:   | AGGGGCCGCCGGCC <u>GAAATC</u> ATGAGAGTCGGAATCGACT<br>TCGGC | <i>Eco</i> R I   |
| Hsp70 <sub>CN</sub> -R:   | CCCGACGGTGC <u>GCAAGCTT</u> GGCTCGCCGATGCGCACCGC          | <i>Hind</i> III  |

TC

Hsp70<sub>NC</sub>-F: CGGCGTGGACACCGCCGGAATTCATGAGAGTCGGAATCGA *EcoR* I

CTTCGGC

Hsp70<sub>NC</sub>-R: GGTGGCGGCGGTGCAAAGCTTGGCTCGCCGATGCGCACCG *Hind* III

CTC

---

**Supplementary Table 2. Experimental grouping of mice for screening adjuvants and immune pathways (36 mice, n=3 per group)**

|          |                      | Immune pathway | IM (18 mice) | SC (18 mice) |
|----------|----------------------|----------------|--------------|--------------|
| Adjuvant |                      |                |              |              |
|          | Montanide ISA 61 VG  |                | Group I      | Group VII    |
| PBS+     | Montanide ISA 206 VG |                | Group II     | Group VIII   |
|          | Montanide GEL 02 PR  |                | Group III    | Group IX     |
|          | Montanide ISA 61 VG  |                | Group IV     | Group X      |
| 66NC+    | Montanide ISA 206 VG |                | Group V      | Group XI     |
|          | Montanide GEL 02 PR  |                | Group VI     | Group XII    |

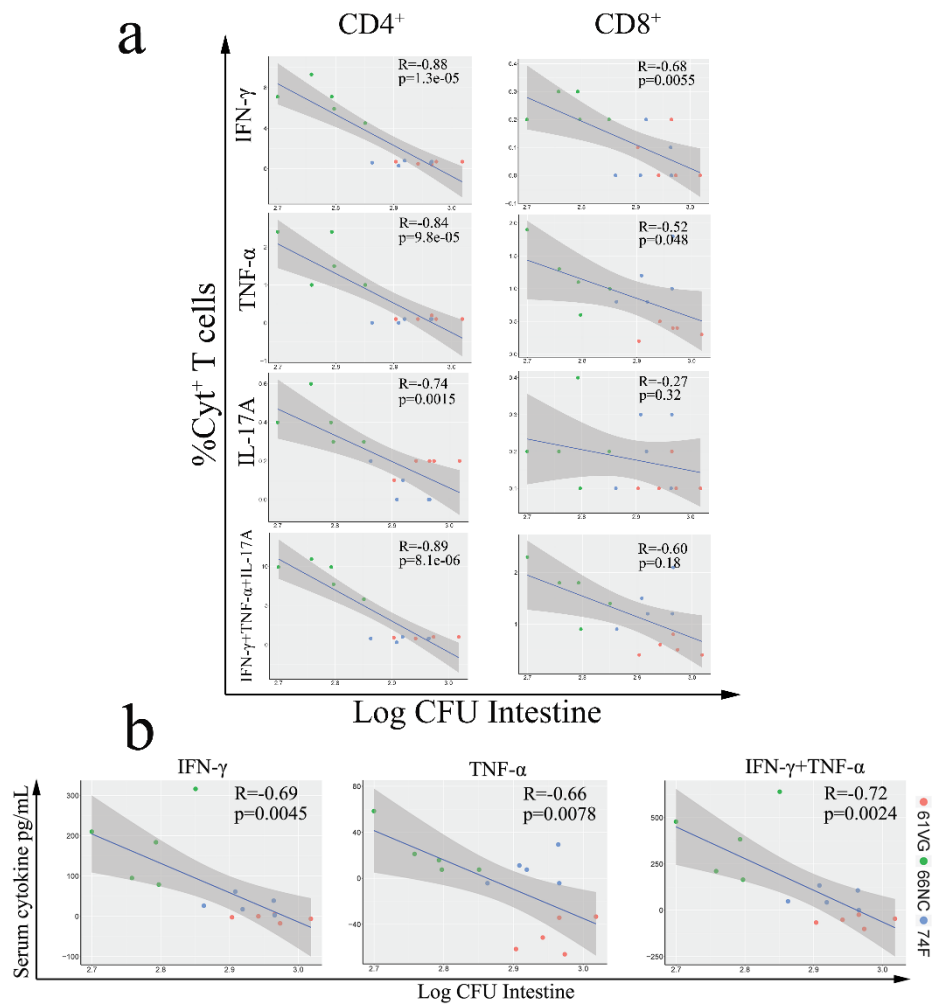

**Supplementary Figure 1. Cellular immune responses post MAP challenge of 66NC vaccinated C57BL/6 mice. (a) Pearson's correlation (R) of Cyt<sup>+</sup> CD4<sup>+</sup> and CD8<sup>+</sup> T lymphocytes with CFU in the intestine following challenge. (b) Pearson's correlations of cytokine levels with CFU in the intestine following challenge for IFN- $\gamma$  and TNF- $\alpha$ .**

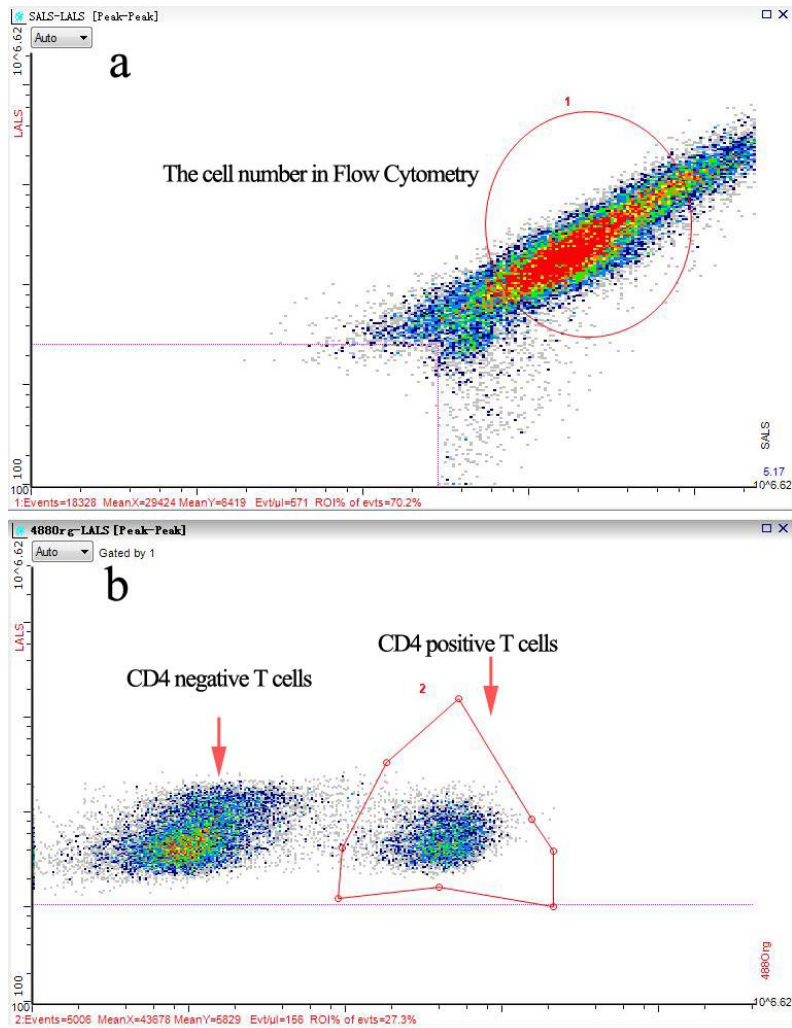

**Supplementary Figure 2. An example of the gating strategy in flow cytometry**

**Supplementary Sequence 1. The nucleotide and amino acid sequence of four fusion protein (66CN, 66NC, 90CN, and 90NC).**

**1-1. The nucleotide sequences of 66CN (1902bp)**

ATGACCGCCGCCACCGACAGCTACAAGATGTCCGGCGGGCAGGGCTTCGCCATCCCGA  
TCGGCCGCGCCATGGCCGTCGCCAACCAGATCCGCTCCGGCGCCGGCTCCAACACCGT  
GCACATCGGGCCCACCGCATTCTCGGGCTGGGCGTGACGGACAACAACGGCAACGG  
CGCGCGGGTGCAGCGGGTGGTCAACACCGGCCCGCCGCGGCCGCGGGCATCGCGCC  
CGGCGACGTCATCACCGGCGTCGACACCGTCCCGATCAACGGGGCGACGTCGATGAC  
CGAGGTGCTCGTCCCGCACCACCCGGTGACACCATCGCGGTGCACTTCCGGTCCGTC  
GACGGCGGCGAGCGCACCGCAACATCACCTGGCGGAGGGGCCCGCCGCGCAATTC  
TTTTCGCGTCCGGGCCTGCCCGTCGAGTACCTGCAGGTGCCCTCCGCGGGAATGGGCC  
GCGACATCAAGGTCCAGTTCAGAGCGGCGGCAACGGCTCCCCCGGGTGTATCTGCT  
GGACGGCCTGCGGGCTCAGGACGACTACAACGGCTGGGACATCAACACCCCGGCCTT

CGAGTGGTACTACCAGTCCGGCCTGTCGGTGATCATGCCCGTCGGCGGACAGTCCAGC  
TTCTACGCGGACTGGTACCAGCCCGCGTGCGGCAAGGCCGGTTGCTCCACTTATAAGT  
GGGAGACCTTCTGACCAGCGAGCTGCCGTCGTACCTGGCCTCCAACAAGGGTGTGA  
AGCGCACCGGCAGCGCCGAGTCGGCATTTCGATGTCCGGATCCTCGGCGATGATCCT  
GGCCGTCAACCATCCCGACCAATTCATCTATGCCGGATCGCTCTCGGCGCTGCTCGACC  
CGTCCCAGGGCATGGGGCCGTCGCTGATCGGTCTGGCGATGGGTGACGCCGGCGGCTA  
CAAGGCCGACGCCATGTGGGGCCCGTCCAGCGACCCGGCCTGGCAGCGCAACGACCC  
GAGCCTGCACATCCCCGAGCTGGTCGGCCACAACACCCGGCTGTGGGTGTAAGTGGGT  
AACGGGACACCGTTCGGAGCTGGGTGGCGCCAACATGCCCGCCGAGTTCCTGGAGAAC  
TTCGTGCGCAGCAGCAACCTGAAGTTCAGGACGCCTACAACGCCGCCGGCGGCCAC  
AACGCCGTGTTCAACTTCAACGCCAACGGAACGCACAGCTGGGAGTACTGGGGAGCC  
CAGCTCAACGCCATGAAGCCCGACCTGCAGGGCACCCCTGGGCGCGTCCCCGGGCGGC  
GGCGGACAAGCTTTCGCGCACCGTCGGGCCTGGCGCTGGACCGGTTCCGCGATCGCCCC  
CTGGCGCCGATCGACCCGTCGGCCATGGTCGGTCAGGTGGGGCCGCAAGTGGTCAAC  
ATCGACACCAAGTTCGGCTACAACAACGCGGTGGGCGCCGGTACCGGCATCGTGATCG  
ACCCGAACGGCGTGGTGCTCACCAACAACCACGTCATCTCGGGCGCCACCGAAATCA  
GCGCGTTCGACGTCGGCAACGGGCAGACCTACGCCGTCGACGTGGTTCGGCTATGACC  
GCACCCAGGACATCGCCGTGCTGCAGCTGCGCGGCGCGGCCGGCCTGCCACCGCCA  
CCATCGGCGGCGAGGCCACGGTGGGCGAGCCATCGTCGCGCTTGGCAACGTCGGCG  
GCCAGGGCGGCACCCCAACGCGGTGGCCGGCAAGGTCGTCGCGCTCAACCAGAGCG  
TCTCGGCGACCGACACGCTGACCGGCGCGCAGGAGAACCTCGGCGGCCTGATCCAGG  
CCGACGCGCCGATCAAGCCGGGCGACTCCGGTGGCCCGATGGTGAACAGCGCCGGGC  
AGGTGATCGGCGTGGACACCGCCACTCGAGCACCACCACCACCACCCTGAGATCCG  
GCTGCTAA

**1-2. The amino acid sequences of 66CN (653aa)**

MGSSHHHHHSSGLVPRGSHMTAATDSYKMSGGQGFPIGRAMAVANQIRSGAGSNTV  
HIGPTAFLGLGVTDNNGNGARVQRVVNTGPAAAAGIAPGDVITGVDTVPINGATSMTEVL  
VPHHPGDTIAVHFRSVDGGERTANITLAEGPPAEFFSRPGLPVEYLQVPSAGMGRDIKVQF  
QSGGNGSPAVYLLDGLRAQDDYNGWDINTPAFEWYYQSGLSVIMPVGGQSSFYADWYQP  
ACGKAGCSTYK WETFLTSELPSYLASNKGVKRTGSAAVGISMSGSSAMILAVNHPDQFIYA  
GSL SALLDPSQGMGPSLIGLAMGDAGGYKADAMWGPSSDPAWQRNDPSLHIPELVGHNT  
RLWVYCGNGTPSELGGANMPAEFLENFVRSSNLKFQDAYNAAGGHNAVFNFNANGTHS  
WEYWGAQLNAMKPD LQGT LGASPGGGGQACAPSGLALDRFADRPLAPIDPSAMVGVQV  
PQVVNIDTKFGYNNAV GAGTGIVDPNGVVL TNNHVISGATEISAFDVGNGQTYAVDVVG  
YDRTQDIAVLQLRGAAGLPTATIGGEATVGEPIVALGNVGGQGGTPNAVAGKVVALNQSV  
SATD TLTGAQENLGG LIQADAPIKPGDSGGPMVNSAGQVIGVDTATRAPPPLRSGC

**2-1. The nucleotide sequences of 66NC (1902bp)**

ATGGCACCGTCCGGCCTGGCGCTGGACCGGTTCCGCGATCGCCCCCTGGCGCCGATCG  
ACCCGTCGGCCATGGTCGGTCAGGTGGGGCCGCAAGTGGTCAACATCGACACCAAGT  
TCGGCTACAACAACGCGGTGGGCGCCGGTACCGGCATCGTGATCGACCCGAACGGCG  
TGGTGCTACCAACAACCACGTCATCTCGGGCGCCACCGAAATCAGCGCGTTCGACGT  
CGGCAACGGGCAGACCTACCGCGTCGACGTGGTTCGGCTATGACCGCACCCAGGACAT  
CGCCGTGCTGCAGCTGCGCGGCGCGGCCGGCCTGCCACCGCCACCATCGGCGGCGA

GGCCACGGTGGGCGAGCCCATCGTCGCGCTTGGCAACGTCGGCGGCCAGGGCGGCAC  
CCCCAACGCGGTGGCCGGAAGGTCGTCGCGCTCAACCAGAGCGTCTCGGCGACCGA  
CACGCTGACCGGCGCGCAGGAGAACCTCGGCGGCCTGATCCAGGCCGACGCGCCGAT  
CAAGCCGGGCGACTCCGGTGGCCCCGATGGTGAACAGCGCCGGGCAGGTGATCGGCGT  
GGACACCGCCGAATTCTTTTCGCGTCCGGGCCTGCCCCGTCGAGTACCTGCAGGTGCC  
TCCGCGGAATGGGCCGCGACATCAAGGTCCAGTTCAGAGCGGCGGCAACGGCTCC  
CCCGCGGTGTATCTGCTGGACGGCCTGCGGGCTCAGGACGACTACAACGGCTGGGAC  
ATCAACACCCCGGCCTTCGAGTGGTACTACCAGTCCGGCCTGTCGGTGATCATGCCCGT  
CGGCGGACAGTCCAGCTTCTACGCGGACTGGTACCAGCCCGCGTGCGGCAAGGCCGG  
TTGCTCCACTTATAAGTGGGAGACCTTCCTGACCAGCGAGCTGCCGTGCTACCTGGCCT  
CCAACAAGGGTGTGAAGCGCACCGGCAGCGCCGAGTCGGCATTTCGATGTCCGGAT  
CCTCGGCGATGATCCTGGCCGTCAACCATCCCGACCAATTCATCTATGCCGGATCGCTC  
TCGGCGCTGCTCGACCCGTCCAGGGCATGGGGCCGTCGCTGATCGGTCTGGCGATGG  
GTGACGCCGGCGGCTACAAGGCCGACGCCATGTGGGGCCCGTCCAGCGACCCGGCCT  
GGCAGCGCAACGACCCGAGCCTGCACATCCCCGAGCTGGTCGGCCACAACACCCGGC  
TGTGGGTGTAAGTGCAGGTAACGGGACACCGTTCGGAGCTGGGTGGCGCCAACATGCCCG  
CCGAGTTCCTGGAGAACTTCGTGCGCAGCAGCAACCTGAAGTTCAGGACGCCTACA  
ACGCCGCCGGCGGCCACAACGCCGTGTTCAACTTCAACGCCAACGGAACGCACAGCT  
GGGAGTACTGGGAGCCAGCTCAACGCCATGAAGCCCGACCTGCAGGGCACCCCTGG  
GCGCGTCCCCGGGCGGCGGCGGACAAGCTTGCACCGCCGCCACCGACAGCTACAAGA  
TGTCGGCGGGCAGGGCTTCGCCATCCCGATCGGCCGCGCCATGGCCGTCGCCAACCA  
GATCCGCTCCGGCGCCGGCTCCAACACCGTGCACATCGGGCCCACCGCATTCCTCGGG  
CTGGGCGTGACGGACAACAACGGCAACGGCGCGCGGGTGCAGCGGGTGGTCAACAC  
CGGCCCGGCCGCGGCCGCGGGCATCGCGCCCGGCGACGTCATCACCGGCGTGCACAC  
CGTCCCGATCAACGGGGCGACGTTCGATGACCGAGGTGCTCGTCCCGCACCACCCCGGT  
GACACCATCGCGGTGCACTTCCGGTCCGTCGACGGCGGCGAGCGCACCGCGAACATC  
ACCCTGGCGGAGGGGCCCGGCCACTCGAGCACCACCACCACCACCTGAGATCC  
GGCTGCTAA

**2-2. The amino acid sequences of 66NC (653aa)**

MGSSHHHHHSSGLVPRGSHMAPSGLALDRFADRPLAPIDPSAMVGVGPQVVNIDTKF  
GYNNAVAGAGTGIVDPNGVVLNHNHVISGATEISAFDVNGQTYAVDVVGYDRTQDIAVL  
QLRGAAGLPTATIGGEATVGEPIVALGNVGGQGGTPNAVAGKVVALNQSVSATDTLTGAQ  
ENLGGLIQADAPIKPGDSSGPMVNSAGQVIGVDTAEFFSRPGLPVEYLQVPSAGMGRDIK  
VQFQSGGNGSPAVYLLDGLRAQDDYNGWDINTPAFEWYYQSGLSVIMPVGGQSSFYADW  
YQPACGKAGCSTYKWEFTLSELPSYLASNKGVKRTGSAAVGISMSGSSAMILAVNHPDQ  
FIYAGSLSALLDPSQGMGPSLIGLAMGDAGGYKADAMWGPSSDPAWQRNDPSLHIPELVG  
HNTRLWVYCGNGTPSELGGANMPAEFLENFVRSSNLKFQDAYNAAGGHNAVFNFNANG  
THSWEYWGAQLNAMKPDQLGTLGASPGGGGQACTAATDSYKMSGGQGFAPIGRAMAV  
ANQIRSGAGSNTVHIGPTAFLGLGVTDNNGNGARVQRVVNTGPAAAAGIAPGDVITGVDT  
VPINGATSMTEVLVPHHPGDTIAVHFRSVDGGERTANITLAEGPPATRAPPPLRSGC

**3-1. The nucleotide sequences of 90CN (2547bp)**

ATGACCGCCGCCACCGACAGCTACAAGATGTCCGGCGGGCAGGGCTTCGCCATCCCGA  
TCGGCCGCGCCATGGCCGTCGCCAACAGATCCGCTCCGGCGCCGGCTCCAACACCGT

GCACATCGGGCCACCGCATTCTCGGGCTGGGCGTGACGGACAACAACGGCAACGG  
CGCGCGGGTGCAGCGGGTGGTCAACACCGGCCCGGCCGCGGCCGCGGGCATCGCGCC  
CGGCGACGTCATCACCGGCGTCGACACCGTCCCGATCAACGGGGCGACGTCGATGAC  
CGAGGTGCTCGTCCCGCACCACCCCGGTGACACCATCGCGGTGCACTTCCGGTCCGTC  
GACGGCGGGGAGCGCACCGCGAACATCACCTGGCGGAGGGGCGCCGGCCGAATTC  
ATGAGAGTCGGAATCGACTTCGGCACAACCCACACCGTTCGTCGCCGCGTCGACCGC  
GGCAACTATCCGGTCGTCTTCTTCGACGGCATGGACGCGTGGCCGTCGATCATCGCCG  
CAACGCCGCCGGGGAGCTGCGCTACGGCGCGGACGCGGCCGCCGTGCGCCACGACCC  
GTCGTGGTCGGTGTGCGCTCGTTCAAACGTCTGCTCAACGACGCCGGGCCGACAGAC  
CCGGGTCAAAGTGGCCGGCCGTGACTACCGGCTGGCCGAACGCTGACCGGTTTTCTG  
GCGCGGCTGAAAACCGATCTGCAGCAGCACTCCAACGCCACCGTGGCCCCCGGGGAG  
CCCATCGAGGCCGCGATCAGCGTGCCGGCCAACGCCTCCAGCGCCCAGCGGCTGCTG  
ACCCTGGACGCCTACGTGGCCGCCGTTTCCACGTTCGTCGCCCTGCTCAACGAGCCGT  
CCGCGGCGAGCCTGGAATACGCGCATCGGTACCGTCCACCATCACCGCCAAACGGGA  
GTACGTGCTCGTCTACGACCTCGGCGGGCGAACCTTCGACGCGTCGCTGCTGAAGATG  
ACCGGGCACTCCAACGAGGTGGTGGTTCAGCGAGGGCATCCAGCGGCTCGGCGGGCAG  
GACTTCGACGAGGGGATCGTCGAGCTGGTTCGCGGGCCGGTTCGCGACCTGCCCGGCCTC  
GACGCCGCCGGCCGCGCGTTGCTGGCCGAGGAATGCGCCGCCCGCAAGGAGGGCGGTC  
GGGCCGACAGCCCGCCGCTTCTGGTTGACCTGTCGCCGTTTCGACCGGCCCCCGTTCT  
CCTGTCCGGTTCGACGACGTGTACGCGGCGTTCGCCCCCGCTGGTTCGATCCGACGATGCG  
GCTGCTGGAGCGGGTGTGCGCGACCCGAGCCGCGGCCGCGCGGACGTGGACTGGTC  
GGAGGTGGCCGGCATCTATGTGGTTCGCGGGGCCGGCGGCTTCCCGCTGGTGTCCCGG  
ATGCTGCGCGCCCGGTTTCGGGGACAAGCGGGTCAAGCGCTCACCGCACCCGTTTCGCC  
GCGACCGCCATCGGGTTGGCGGTGTTCTTGGACAAGGAATCGGGTTTTGCGCTGTCCG  
AACGCTTTTCGCGGAATTTTCGGGGTGTTCGGGGAGGCGGAGGCGGGCGCCGGGGTGG  
TGTTTCGACCCGATCGTGTGCAAGGACGTGTGCTGCCGGCCGACGGGCAGACCCCGC  
TGGTGGTCAAGCGGGGATAACCGCGCCGCGACAACATCGGGCACTTCCGGTTCGTGGA  
GTGCAGCCGGCTGGTTCGACGGGCGACCCGACGGCGACATCACCCCGTATGACCCGGT  
GCTGTTTCCGTTTCGACCCGGCGCTGCGCGACCGCGACGACCTGGGCCGCCAGCCGGT  
CGGCCGGTGGCGGGACGGACCCGACGTCGAGGAGCGCTACGTGATCGCGCCCAGCGG  
TGCGGTGGAGGTGACGTTGACGACGACCGGCCGGCTTCGAACGCACCTTCCGGCT  
GGAGCGGTGCGCATCGGCGAGCCAAGCTTTCGCGACCGTTCGGCCCTGGCGCTGGACCG  
GTTTCGCCGATCGCCCCCTGGCGCCGATCGACCCGTTCGGCCATGGTTCGGTTCAGGTGGGG  
CCGCAAGTGGTCAACATCGACACCAAGTTCGGCTACAACAACGCGGTGGGCGCCGGT  
ACCGGCATCGTGATCGACCCGAACGGCGTGGTGTCTACCAACAACCACGTCATCTCGG  
GCGCCACCGAAAATCAGCGCGTTCGACGTTCGGCAACGGGCAGACCTACGCCGTTCGACG  
TGGTTCGGCTATGACCGCACCCAGGACATCGCCGTGCTGCAGCTGCGCGGGCGCGGCCG  
CCTGCCACCGCCACCATCGGCGGGGAGGCCACGGTGGGGCGAGCCCATCGTTCGCGCTT  
GGCAACGTTCGGCGGCCAGGGCGGCACCCCAACGCGGTGGCCGGCAAGGTTCGTTCG  
GCTCAACCAGAGCGTCTCGGGACCGACACGCTGACCGGCGCGCAGGAGAACCTCGG  
CGGCCTGATCCAGGCCGACGCGCCGATCAAGCCGGGCGACTCCGGTGGCCCCGATGGT  
GAACAGCGCCGGGCAGGTGATCGGCGTGGACACCGCCACTCGAGCACCAACCACCACC  
ACCACTGAGATCCGGCTGCTAA

**3-2. The amino acid sequences of 90CN (868aa)**

MGSSHHHHHSSGLVPRGSHMTAATDSYKMSGGQGFAPIGRAMAVANQIRSGAGSNTV  
HIGPTAFLGLGVTDNNGNGARVQRVVNTGPAAAAGIAPGDVITGVDTVPINGATSMTEVL  
VPHHPGDTIAVHFRSVDGGERTANITLAEGPPAEFMRVIGIDFGTTHTVVAVDRGNYPVVF  
FDGMDAWPSIIAANAAGELRYGADAAVRHDPWSVLSFKRLLNDAGPQTRVKLAGRD  
YRLAELLTGFLARLKTDLQHSNATVAPGEPIEAAISVPANASSAQRLTLDAYVAAGFHV  
VALLNEPSAASLEYAHRYRSTITAKREYVLVYDLGGGTFDASLLKMTGHSNEVVVSEGIQ  
RLGGDDFDEAIVELVRAGADLPGLDAAGRALLAEECAARKEAVGPQTRRFLVDLSPFDRP  
PFSCPVDVYAACAPLVDPTMRLLERVLDRDPSRGRADVDWSEVAGIYVVGAGGFPLVSR  
MLRARFGDKRVKRSPPFAATAIGLAVFLDKESGFALSERFSRNFVGFREAEAGAGVVFDP  
IVCKDVSLPADGQTPLVVKRRYRAAHNIGHFRFVECSRLVDGRPDGDITPYDPVLPFPDPA  
LRDRDDLGRQPVGRWRDGPDVEERYVIAPSGAVEVTLTTQPAGFERTFRLERCASASQAC  
APSGLALDRFADRPLAPIDPSAMVGQVGPQVVNIDTKFGYNNAVGAGTGIVIDPNGVVLT  
NNHVISGATEISAFDVGNGQTYAVDVVGYDRTQDIAVLQLRGAAGLPTATIGGEATVGEPI  
VALGNVGGQGGTPNAVAGKVVALNQSVSATDTLTGAQENLGGLIQADAPIKPGDSSGPM  
VNSAGQVIGVDTATRAPPPLRSGC

**4-1. The nucleotide sequences of 90NC (2547bp)**

ATGGCACCGTCGGGCTGGCGCTGGACCGGTTCCGCCGATCGCCCCCTGGCGCCGATCG  
ACCCGTCGGCCATGGTCGGTCAGGTGGGGCCGCAAGTGGTCAACATCGACACCAAGT  
TCGGCTACAACAACGCGGTGGGCGCCGGTACCGGCATCGTGATCGACCCGAACGGCG  
TGGTGCTACCAACAACCACGTCATCTCGGGCGCCACCGAAATCAGCGCGTTCGACGT  
CGGCAACGGGCAGACCTACGCCGTCGACGTGGTCGGCTATGACCGCACCCAGGACAT  
CGCCGTGCTGCAGCTGCGCGGGCGCGGCCGGCCTGCCACCGCCACCATCGGCGGGCA  
GGCCACGGTGGGCGAGCCCATCGTCGCGCTTGGCAACGTCGGCGGCCAGGGCGGCAC  
CCCCAACGCGGTGGCCGGCAAGGTCGTCGCGCTCAACCAGAGCGTCTCGGCGACCGA  
CACGCTGACCGGCGCGCAGGAGAACCTCGGCGGCCTGATCCAGGCCGACGCGCCGAT  
CAAGCCGGGCGACTCCGGTGGCCCGATGGTGAACAGCGCCGGGCAGGTGATCGGCGT  
GGACACCGCCGAATTCATGAGAGTCGGAATCGACTTCGGCACAACCCACACCGTCGTC  
GCCGCCGTCGACCGCGGCAACTATCCGGTCGTCTTCTTCGACGGCATGGACGCGTGGC  
CGTCGATCATCGCCGCCAACGCCCGCGGGGAGCTGCGCTACGGCGCGGACGCGGCCG  
CCGTGCGCCACGACCCGTCGTGGTTCGGTGTGCTGCGCTCGTTCAAACGTCGTCTAACGA  
CGCCGGGCGCAGACCCGGGTCAAGCTGGCCGGCCGTGACTACCGGCTGGCCGAAC  
GCTGACCGGTTTTCTGGCGCGGTGAAAACCGATCTGCAGCAGCACTCCAACGCCACC  
GTGGCCCCGGGAGCCCATCGAGGCCGCGATCAGCGTGCCGGCCAACGCCTCCAGC  
GCCAGCGGCTGCTGACCCTGGACGCCTACGTGGCCGCCGGTTTCCACGTCGTCGCC  
TGCTCAACGAGCCGTCGCGGGCAGCCTGGAATACGCGCATCGGTACCGCTCCACCAT  
CACCGCCAAACGGGAGTACGTGCTCGTCTACGACCTCGGCGGCGGAACCTTCGACGC  
GTCGCTGCTGAAGATGACCGGGCACTCCAACGAGGTGGTGGTTCAGCGAGGGCATCCA  
GCGGCTCGGCGGCGACGACTTCGACGAGGCGATCGTCGAGCTGGTGCGGGCCGGTGC  
GGACCTGCCCGGCTCGACGCCGCCGGCCGCGCGTTGCTGGCCGAGGAATGCGCCGC  
CCGCAAGGAGGCGGTCGGGCGCAGACCCGCCGCTTCTGTTGACCTGTCGCCGTT  
CGACCGGCCCCGTTCTCCTGTCCGGTCGACGACGTGTACGCGCGTGCGCCCCGCTG  
GTCGATCCGACGATGCGGCTGCTGGAGCGGGTGTGCGCGACCCGAGCCGCGGCCG  
GCGGACGTGGACTGGTTCGGAGGTGGCCGGCATCTATGTGGTTCGGCGGGGCCGGCGG



TTCCCGCTGGTGTCCCGGATGCTGCGCGCCCGGTTTCGGGGACAAGCGGGTCAAGCGCT  
CACCGCACCCGTTCCGCCGACCGCCATCGGGTTGGCGGTGTTCTTGGACAAGGAATC  
GGGTTTTGCGCTGTCCGAACGCTTTTCGCGGAATTTTCGGGGTGTTCGGGGAGGCGGAG  
GCGGGCGCCGGGGTGGTGTTCGACCCGATCGTGTGCAAGGACGTGTCGCTGCCGGCC  
GACGGGCAGACCCCGCTGGTGGTCAAGCGGCGATACCGCGCCGCGCACAACATCGGG  
CACTTCCGGTTCGTGGAGTGCAGCCGGCTGGTCGACGGGGCAGCCGACGGCGACATC  
ACCCCGTATGACCCGGTGTGTTTCCGTTTCGACCCGGCGCTGCGCGACCGCGACGACC  
TGGGCCGCCAGCCGGTCCGGCCGGTGGCGGGACGGACCCGACGTCGAGGAGCGCTACG  
TGATCGCGCCCAGCGGTGCGGTGGAGGTGACGTTGACGACGCAGCCGGCCGGCTTCG  
AACGCACCTTCCGGCTGGAGCGGTGCGCATCGGCGAGCCAAGCTTGCACCGCCGCCA  
CCGACAGCTACAAGATGTCCGGCGGGCAGGGCTTCGCCATCCCGATCGGCCGCGCCAT  
GGCCGTGCGCAACCAGATCCGCTCCGGCGCCGGCTCCAACACCGTGCACATCGGGCCC  
ACCGCATTCCTCGGGCTGGGCGTGACGGACAACAACGGCAACGGCGCGCGGGTGCAG  
CGGGTGGTCAACACCGGCCCGGCCGCGGCCGCGGGCATCGCGCCCGGCGACGTCATC  
ACCGGCGTCGACACCGTCCCGATCAACGGGGCGACGTCGATGACCGAGGTGCTCGTC  
CCGACCAACCCCGGTGACACCATCGCGGTGCACTTCCGGTCCGTCGACGGCGGCGAG  
CGCACCGGAACATCACCTGGCGGAGGGGCCCGGCCACTCGAGCACCAACCA  
CCACCACTGAGATCCGGCTGCTAA

**4-2. The amino acid sequences of 90NC (868aa)**

MGSSHHHHHSSGLVPRGSHMAPSGLALDRFADRPLAPIDPSAMVGVGPQVVNIDTKF  
GYNNAVAGAGTGIVIDPNGVVLNHNHVISGATEISAFDVGNQTYAVDVVGYDRTQDIAVL  
QLRGAAGLPTATIGGEATVGEPIVALGNVGGQGGTPNAVAGKVVALNQSVSATDTLTGAQ  
ENLGGLIQADAPIKPGDSGGPMVNSAGQVIGVDTAEFMRVGIDFGTHTTVAAVDRGNYP  
VVFDDGMDAWPSIIAANAAGELRYGADAAVRHDPSSVLSFKRLLNDAGPQTRVKLA  
GRDYRLAELLTGFLARLKTDLQQHSNATVAPGEPIEAAISVPANASSAQRLTLDAYVAAG  
FHVVALLNEPSAASLEYAHRYRSTITAKREYVLVYDLGGGTFDASLLKMTGHSNEVVVSE  
GIQRLGGDDFDEAIVELVRAGADLPLGLDAAGRALLAEECAARKEAVGPQTRRFLVDLSPF  
DRPPFSCPVDDVYAACAPLVDPTMRLLERVLRDPSRGRADVDWSEVAGIYVVGAGGFP  
LVSRLRLRFRGDKRVKRSHPFAATAIGLAVFLDKESGFALSERFSRNFGVFREAEAGAGV  
VFDPIVCKDVSLPADGQTPLVVKRRYRAAHNIGHFRFVECSRLVDGRPDGDITPYDPVLP  
FDPALRDRDDLGRQPVGRWRDGPDVEERYVIAPSGAVEVTLTTQPAGFERTFRLERCASAS  
QACTAATDSYKMSGGQGFAPIGRAMAVANQIRSGAGSNTVHIGPTAFLGLGVTDNNGNG  
ARVQRVVNTGPAAAAGIAPGDVITGVDTVPINGATSMTEVLVPHHPGDIAVHFRSVDGG  
ERTANITLAEGPPATRAPPPLRSGC
